# Supplementary material
Source: PubMed Central journal article supplement (PMC151363)
Supplement: pnas_0437964100_6.pdf [file pnas_0437964100_6.pdf]

## A. Structure of signal joins generated in 2BN

|      | 12RSS                | 23RSS                   |
|------|----------------------|-------------------------|
|      | TTCCAGTCTGTAGCACTGTG | CACAGTGGTAGTACTCCACTGTC |
| (10) | TTCCAGTCTGTAGCA      | CACAGTGGTAGTACTCCACTGTC |
| (6)  | TTCCAGTCTGTAGCACTGTG | GTAGTACTCCACTGTC        |
| (5)  | TTCCAGTCTGTAG        | CACAGTGGTAGTACTCCACTGTC |
|      | TTCCAGTCTGTAGCACTGTG | CACAGTGGTAGTACTCCACTGTC |
|      | TTCCAGTCTGTAG        | GTAGTACTCCACTGTC        |
|      | TTCCAGTCTGTAGCACT    | CACAGTGGTAGTACTCCACTGTC |
|      | TTCCAGTCTGTAG        | CAGTGGTAGTACTCCACTGTC   |
|      | TTCCAGTC             | CACTGTC                 |
|      | TTCCAGTCTGTAGCACTGT  | CACAGTGGTAGTACTCCACTGTC |
|      | TTCCAGTCTGTAGCACTGT  | AGTGGTAGTACTCCACTGTC    |
|      | TTCCAGTCTGTAGCACTGT  | C                       |
|      | TTCCAGTCTGTAGCACTG   | CAGTGGTAGTACTCCACTGTC   |
|      | TTCCAGTCTGTAGCACTG   | CACAGTGGTAGTACTCCACTGTC |
|      | TTCCAGTCTGTAG        | TGGTAGTACTCCACTGTC      |
|      | TTCCAGTCT            | CACAGTGGTAGTACTCCACTGTC |
|      | TTCCAGTCTGTA         | CAGTGGTAGTACTCCACTGTC   |

## B. Structure of coding joins generated in 1BR3neo and 2BNneo

|                 | 12Flank          | N   | 23 Flank                        |
|-----------------|------------------|-----|---------------------------------|
|                 | TTGGCTGCAGGTCGAC |     | GGATCCCCGGGGATCAGCTTGGCG (del.) |
| <b>1BR3neo:</b> |                  |     |                                 |
| (3)             | TTGGCTGCAGGTCGA  |     | TCCCCGGGGATCAGCTTGGCG (-4)      |
| (2)             | TTGGCTGCAG       |     | ATCCCCGGGGATCAGCTTGGCG (-8)     |
| (2)             | TTGGCTGCAGGTCG   |     | GATCCCCGGGGATCAGCTTGGCG (-3)    |
|                 | TTGGCTGCAGGTCGA  |     | GGATCCCCGGGGATCAGCTTGGCG (-1)   |
|                 | TTGGCTGCAGGTCGAC |     | GATCCCCGGGGATCAGCTTGGCG (-1)    |
|                 | TTGGCTGCAGGTCG   |     | GGATCCCCGGGGATCAGCTTGGCG (-2)   |
|                 | TTGGCTGCAGGTCGAC |     | ATCCCCGGGGATCAGCTTGGCG (-2)     |
|                 | TTGGCTGCAGGTCGAC | G   | TCCCCGGGGATCAGCTTGGCG (-4+1)    |
|                 | TTGGCTGCAGGTCGAC |     | TCCCCGGGGATCAGCTTGGCG (-4)      |
|                 | TTGGCTGCAGGT     |     | GGATCCCCGGGGATCAGCTTGGCG (-4)   |
|                 | TTGGCTGCAGGTC    |     | ATCCCCGGGGATCAGCTTGGCG (-5)     |
|                 | TTGGCTGCAGG      |     | GGATCCCCGGGGATCAGCTTGGCG (-5)   |
|                 | TTGGCTGCAGGT     |     | GATCCCCGGGGATCAGCTTGGCG (-5)    |
|                 | TTGGCTGCAGG      |     | GATCCCCGGGGATCAGCTTGGCG (-6)    |
|                 | TTGGCTGCAGGT     |     | CCCCGGGGATCAGCTTGGCG (-8)       |
| <b>2BNneo:</b>  |                  |     |                                 |
| (11)            | TTGGCTGCAGGTC    |     | CCCCGGGGATCAGCTTGGCG (-8)       |
| (5)             | TTGGCTGCAGGTCGAC |     | CCCCGGGGATCAGCTTGGCG (-4)       |
| (5)             | TTGGCTGCAGGTCGA  |     | TCCCCGGGGATCAGCTTGGCG (-4)      |
| (3)             | TTGGCTGCAGGTC    |     | GGGGATCAGCTTGGCG (-11)          |
| (2)             | TTGGCTGCAGGTC    |     | CCCCGGGGATCAGCTTGGCG (-7)       |
| (2)             | TTGGCTGCAGGTC    |     | AGCTTGGCG (-18)                 |
|                 | TTGGCTGCAGGTCGAC |     | TCCCCGGGGATCAGCTTGGCG (-3)      |
|                 | TTGGCTGCAGGTCG   |     | GATCCCCGGGGATCAGCTTGGCG (-3)    |
|                 | TTGGCTGCAGG      |     | ATCCCCGGGGATCAGCTTGGCG (-7)     |
|                 | TTGGCTGCAGG      |     | TCCCCGGGGATCAGCTTGGCG (-8)      |
|                 | TTGGCTGCA        |     | CCGGGGATCAGCTTGGCG (-13)        |
|                 | TTGGCTGCAGGTCGA  |     | TCAGCTTGGCG (-14)               |
|                 | TTGGCTGCAG       | TGT | GGATCAGCTTGGCG (-16+3)          |
|                 | TTGGCTGCAGGTCGAC |     | TTGGCG (-18)                    |
|                 | TTGGCTGCAGG      |     | CTTGGCG (-22)                   |
|                 | TTGGCTGCAGGTC    |     | GCG (-24)                       |
|                 | TTGGC            |     | G (-34)                         |
|                 | TTG              |     | CG (-35)                        |
|                 | TT               |     | G (-37)                         |
