# Supplementary material
Source: PubMed Central journal article supplement (PMC151363)

A

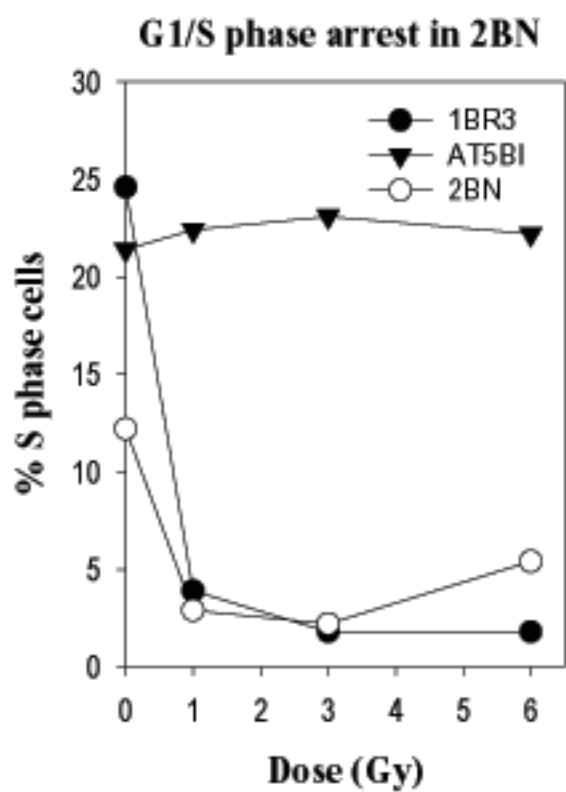

B

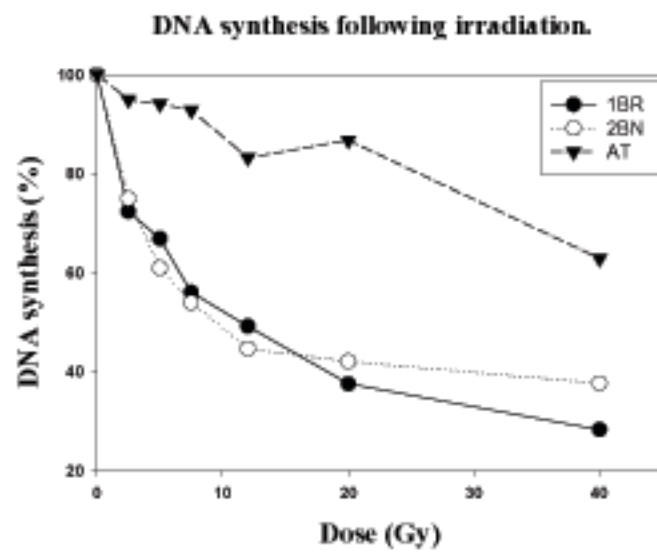

Supplement: pnas_0437964100_7.pdf [file pnas_0437964100_7.pdf]
